# Supplementary material for: Urbanisation at Multiple Scales Is Associated with Larger Size and Higher Fecundity of an Orb-Weaving Spider
Source: PLOS journal article supplement (doi:10.1371/journal.pone.0105480), 2014-08-20
Supplement: S2 (10.1371/journal.pone.0105480.s002) [file journal.pone.0105480.s002]

Table S2: Components and their associated variables for the PCA at Landscape, local and microhabitat scales. +/- values indicate a positive or negative association with each variable within the component

| PCA component  | % Variance | Represents                      | Loadings                                       | Association with variables                                                                                                            |
|----------------|------------|---------------------------------|------------------------------------------------|---------------------------------------------------------------------------------------------------------------------------------------|
| Landscape 1    | 43.3       | Urbanisation                    | -0.86<br>0.84<br>0.83<br>0.80<br>0.78<br>-0.77 | 1km % vegetation,<br>1km % hard surface<br>Housing density<br>Population density<br>Site distance to bushland<br>Site distance to CBD |
| Landscape 2    | 13.9       | Socioeconomics                  | 0.84<br>-0.83                                  | Site distance to parkland<br>Average house hold income                                                                                |
| Landscape 3    | 12.4       | Less grass, close to water      | -0.53<br>0.84                                  | 1km % grass<br>site distance to water                                                                                                 |
| Landscape 4    | 9.0        | Proximity to coast              | -0.77<br>0.61                                  | Site distance to coast<br>1km % water                                                                                                 |
| Local 1        | 42.1       | Urbanisation                    | -0.96<br>0.77<br>0.76<br>0.71                  | Site % vegetation<br>Site % grass<br>Site % hard surfaces<br>Site % buildings                                                         |
| Local 2        | 26.4       | Larger and less elongated sites | 0.89<br>0.84<br>-0.80<br>0.42                  | Perimeter (m)<br>Site Area (m2)<br>Shape<br>Site % water                                                                              |
| Microhabitat 1 | 27.5       | Further from urban disturbance  | 0.94<br>0.92<br>0.79<br>0.76<br>0.66           | Distance to hard surface<br>Distance to open space<br>Distance to edge<br>Distance to buildings<br>10m %water                         |
| Microhabitat 2 | 17.4       | Less urbanised microhabitat     | -0.92<br>-0.84<br>0.75                         | 10m % hard surfaces<br>Man-made structures<br>10m % vegetation                                                                        |
| Microhabitat 3 | 10.8       | Groundcover complexity          | -0.89<br>0.61                                  | 10m % grass<br>Leaf litter                                                                                                            |
| Microhabitat 4 | 8.5        | Habitat complexity              | 0.83<br>0.63<br>0.60                           | Tree density<br>Total habitat quality<br>Tree canopy cover                                                                            |
| Microhabitat 5 | 8.0        | Vegetation density              | 0.77<br>0.61<br>0.47                           | Ground vegetation cover<br>Distance to water<br>Shrub cover                                                                           |
